# Supplementary material
Source: Springer Nature journal article supplement (https://www.springermedizin.de/resource/supplementary/12899_2005_82_MOESM1_ESM.pdf/9514892)

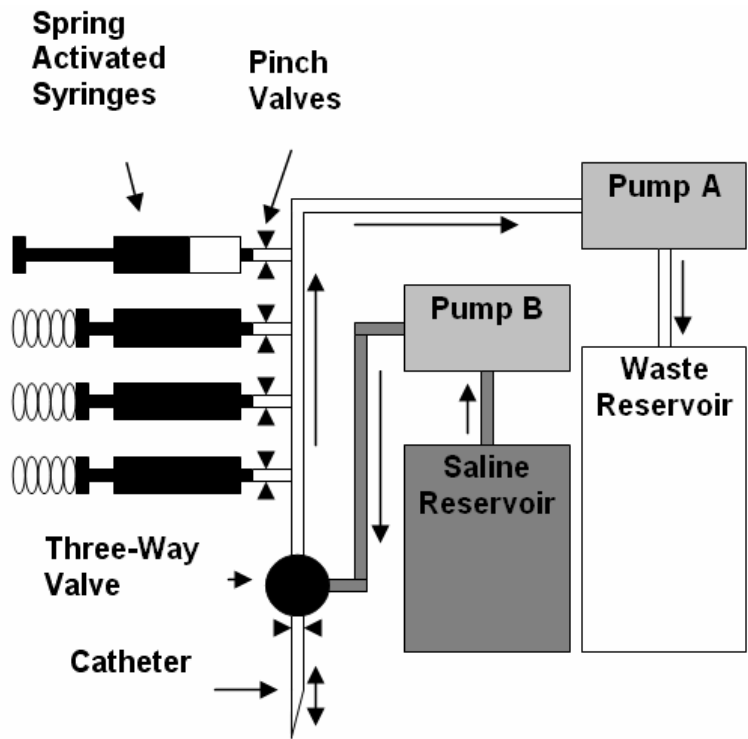

Supplement: MOESM1 [file 9514892]
